# Supplementary material for: A Facile Method to Produce N-Terminally Truncated α-Synuclein
Source: PubMed Central journal article supplement (PMC9184721; doi:10.3389/fnins.2022.881480), 2022-05-27
Supplement: Data_Sheet_1.pdf [file Data_Sheet_1.pdf]

## Supplementary Material

### *A Facile Method to Produce N-Terminally Truncated $\alpha$ -Synuclein*

#### Supplementary Figures

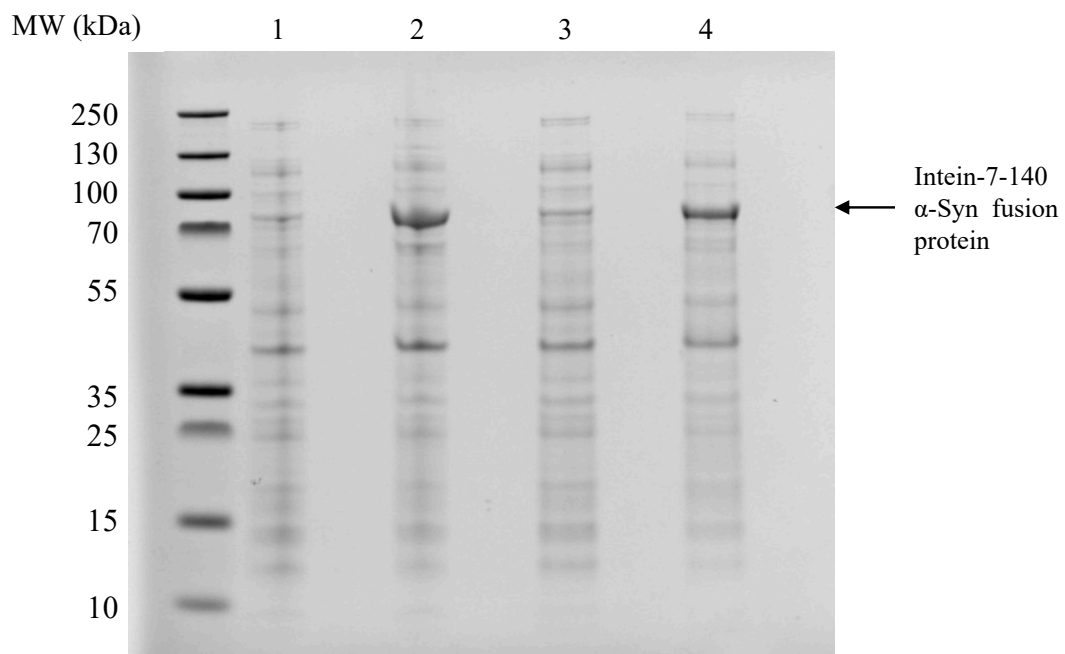

**Supplementary Figure 1.** SDS-PAGE of cell lysate before and after induction of protein expression with 1 mM IPTG. We induced expression at 28°C overnight (lane 2) and at 37°C for 4 hours (lane 4). Lanes 1 and 3 contain the lysate of cell aliquots taken before induction at 28°C and 37°C respectively. The indicated band in lanes 2 and 4 corresponds to the 72.1 kDa intein-7-140  $\alpha$ -syn fusion protein.

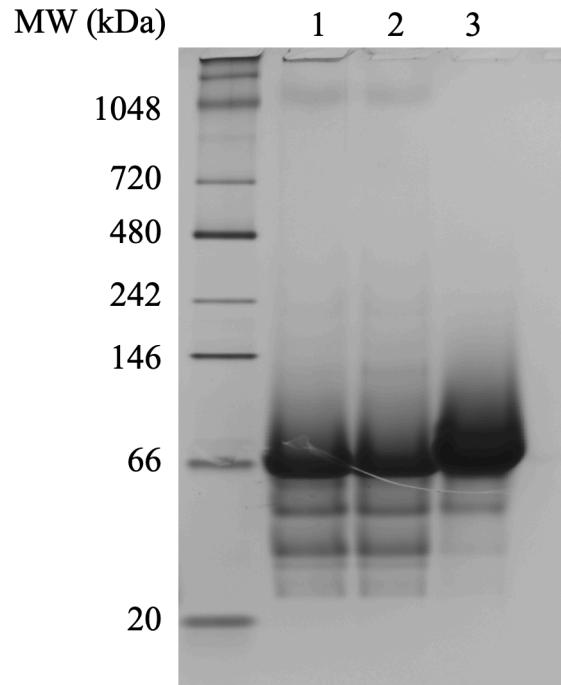

**Supplementary Figure 2.** Native PAGE of 7-140  $\alpha$ -syn before (lane 2) and after (lane 1) boiling at 80°C for 20 mins, alongside conventionally purified WT  $\alpha$ -syn (lane 3).

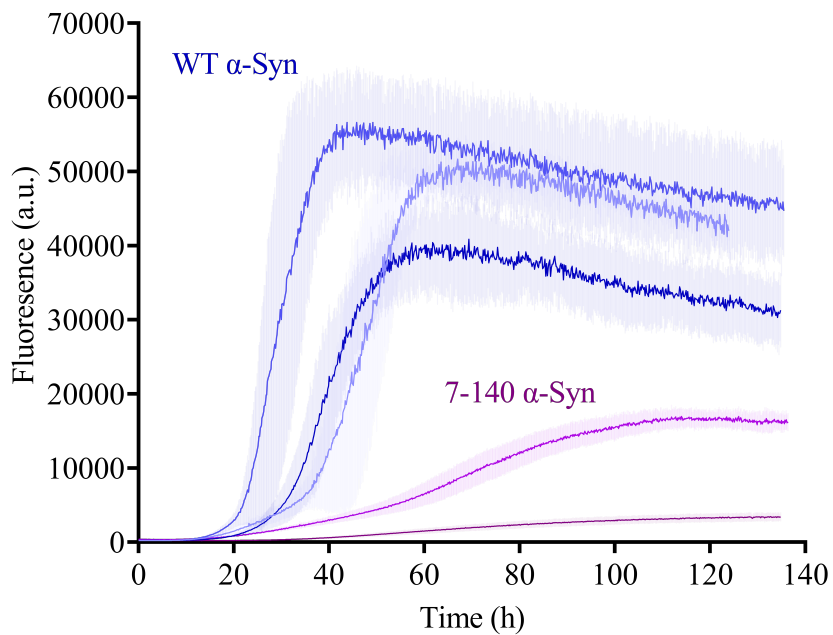

**Supplementary Figure 3.** Raw data for the beaded aggregation of WT  $\alpha$ -syn (blue) and 7-140  $\alpha$ -syn (purple). Error bars representing the standard deviation are shown as transparent bars. Each data set is the average of at least three technical replicates.

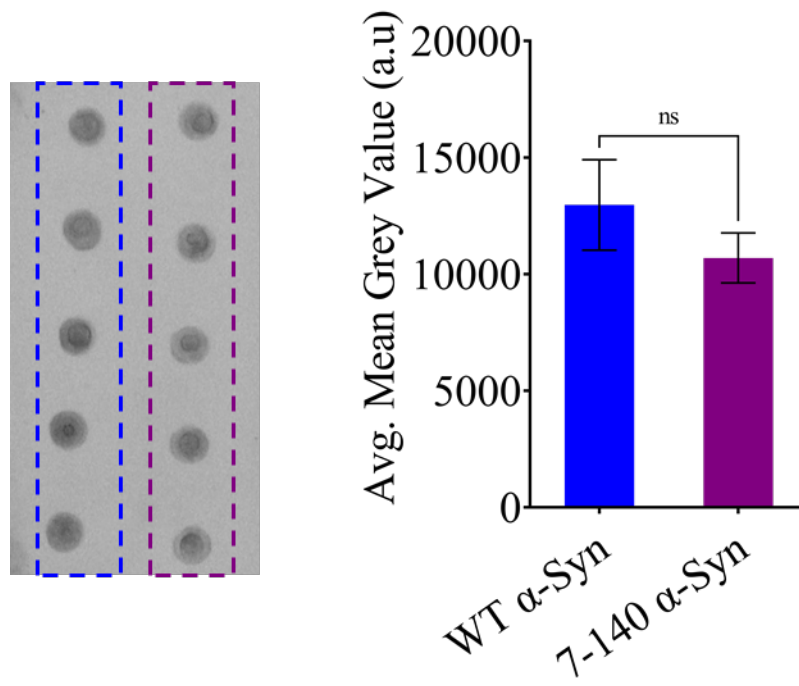

**Supplementary Figure 4.** Dot blot (left) and corresponding quantification (right) of monomeric WT (blue) and 7-140 (purple)  $\alpha$ -syn ( $n = 5$ , values represent means and error bars are the standard deviation, Welch's  $t$ -test ns,  $p = 0.0597$ ).

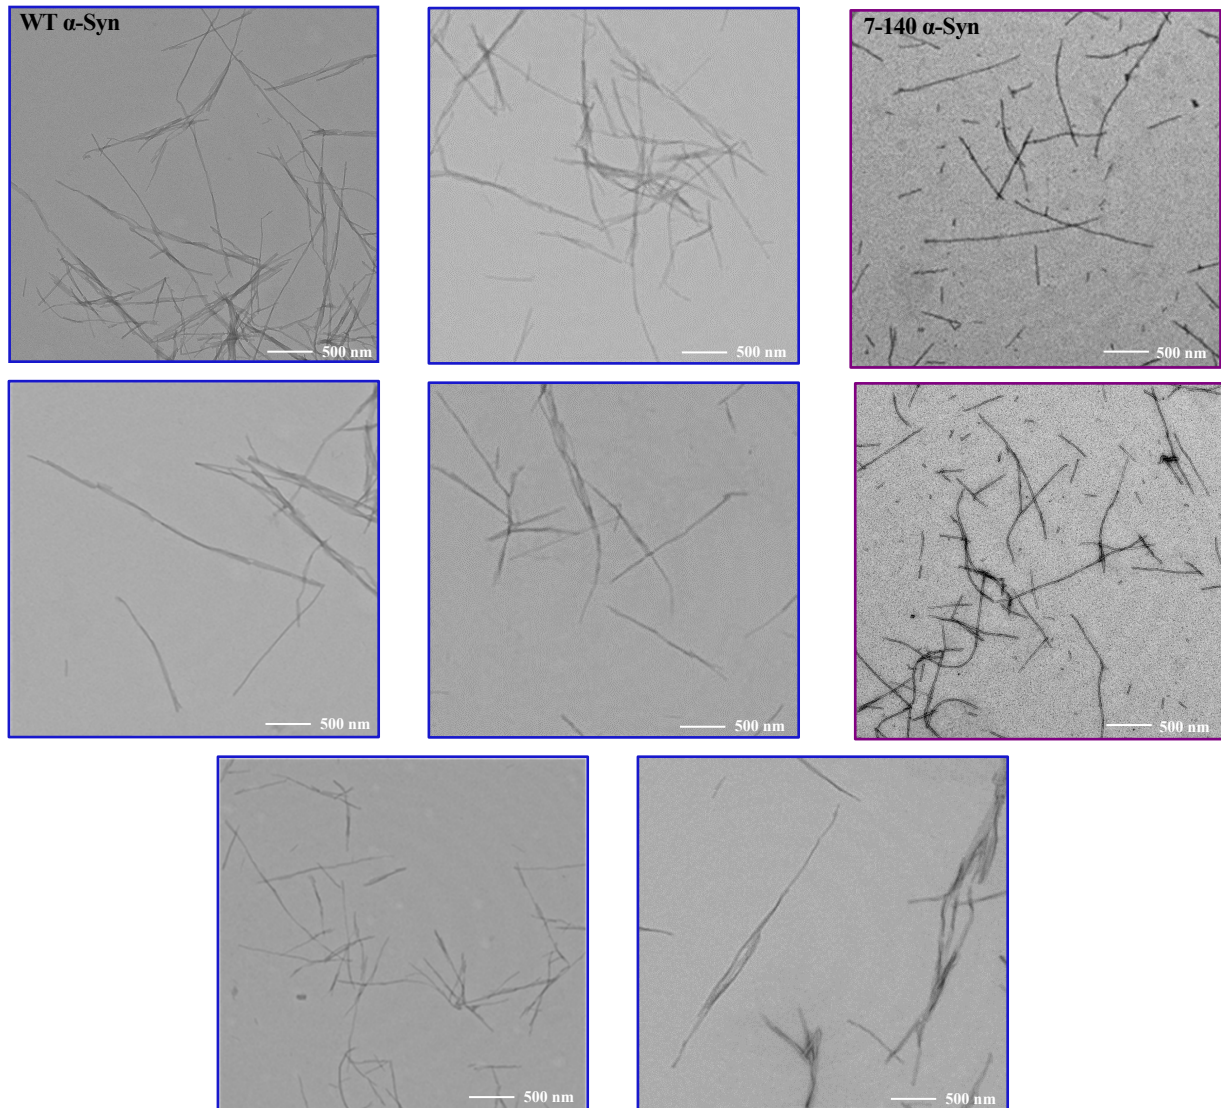

**Supplementary Figure 5.** Additional TEM images of WT (blue) and 7-140 (purple)  $\alpha$ -syn fibrils after ~140 h of aggregation that have been used for the quantification of fibril length and width presented in Figure 4B and 4C.
